RESEARCH PAPER

# Function of *Arabidopsis* hexokinase-like1 as a negative regulator of plant growth

Abhijit Karve\* and Brandon d. Moore†

Department of Genetics and Biochemistry, Clemson University, Clemson SC 29634, USA

Received 21 January 2009; Revised 3 July 2009; Accepted 29 July 2009

## Abstract

A recent analysis of the hexokinase (HXK) gene family from *Arabidopsis* revealed that three hexokinase-like (HKL) proteins lack catalytic activity, but share about 50% identity with the primary glucose (glc) sensor/transducer protein AtHXK1. Since the AtHKL1 protein is predicted to bind glc, although with a relatively decreased affinity, a reverse genetics approach was used to test whether HKL1 might have a related regulatory function in plant growth. By comparing phenotypes of an HKL1 mutant (*hkl1-1*), an HXK1 mutant (*gin2-1*), and transgenic lines that overexpress HKL1 in either wild-type or *gin2-1* genetic backgrounds, it is shown that HKL1 is a negative effector of plant growth. Interestingly, phenotypes of HKL1 overexpression lines are generally very similar to those of *gin2-1*. These are quantified, in part, as reduced seedling sensitivity to high glc concentrations and reduced seedling sensitivity to auxin-induced lateral root formation. However, commonly recognized targets of glc signalling are not apparently altered in any of the HKL1 mutant or transgenic lines. In fact, most, but not all, of the observed phenotypes associated with HKL1 overexpression occur independently of the presence of HXK1 protein. The data indicate that HKL1 mediates cross-talk between glc and other plant hormone response pathways. It is also considered whether a possibly decreased glc binding affinity of HKL1 could possibly be a feedback mechanism to limit plant growth in the presence of excessive carbohydrate availability is further considered.

**Key words:** Auxin, glucose signalling, growth regulation, GUS staining, hexokinase, hexokinase-like, hypocotyl elongation, plant hormones.

## Introduction

All living organisms have complex regulatory networks that enable them to sense their nutrient status and to adjust their growth and development accordingly. Glucose (glc) is an important metabolic nutrient, which also functions as a signalling molecule that regulates gene expression in a variety of organisms (Towle, 2005; Rolland *et al.*, 2006; Gancedo, 2008). In plants, glc affects the expression of more than 1000 genes involved in a diverse array of biological processes (Price *et al.*, 2004; Osuna *et al.*, 2007). Many of the glc-regulated genes are involved in phytohormone biosynthesis and response pathways which control plant growth (Gibson, 2004). Furthermore, genetic studies indicate that

many mutants of plant glc signalling are alleles of genes with defined roles in ABA or ethylene biosynthesis, or their signalling networks (Leon and Sheen, 2003; Rognoni *et al.*, 2007).

Genetic and biochemical evidence indicates that two *Arabidopsis* proteins, hexokinase1 (HXK1) and the regulator of G-protein signalling1 (RGS1), have independent roles in glc sensing and phytohormone responses (Rolland *et al.*, 2006). As a glc sensor, AtHXK1 modulates plant growth at many different developmental stages (Moore *et al.*, 2003). A null mutant of AtHXK1, *gin2-1*, has reduced shoot and root growth, increased apical dominance, delayed flowering, and

\* Present address: Environmental Sciences Division, Oak Ridge National Laboratory, 1 Bethel Valley Road, Oak Ridge, TN 37831, USA.

† To whom correspondence should be addressed: E-mail: [moore8@clemson.edu](mailto:moore8@clemson.edu)

Abbreviations: GFP, green fluorescent protein; GUS, glucuronidase; HA, haemagglutinin; HKL, hexokinase-like; HXK, hexokinase; LD, long day; LUC, luciferase; NAA, naphthalene acetic acid; NPA, 1-naphthylphthalamic acid; PPK, pyruvate orthophosphate dikinase; RBCS, ribulose-1,5-bisphosphate carboxylase small subunit; RT-PCR, reverse transcriptase polymerase chain reaction; SD, short day; UBI, ubiquitin.

© 2009 The Author(s).

This is an Open Access article distributed under the terms of the Creative Commons Attribution Non-Commercial License (<http://creativecommons.org/licenses/by-nc/2.5/uk/>) which permits unrestricted non-commercial use, distribution, and reproduction in any medium, provided the original work is properly cited.

altered sensitivities to auxin, cytokinin, and glc (Moore *et al.*, 2003). On the other hand, AtRGS1 has been suggested to function as a glc binding protein that can attenuate cell division in primary root apical meristems through its interaction with GPA1, a heterotrimeric G-protein subunit (Chen *et al.*, 2006; Johnston *et al.*, 2007). Similar to HXK1, plant heterotrimeric G-proteins also affect a diverse array of developmental and hormone responses (Perfus-Barbeoch *et al.*, 2004). However, even though seedlings of null mutants of both AtHXK1 and AtRGS1 fail to undergo normal glc-dependent cell cycle arrest, their hypocotyl elongation responses at low light are opposite to each other (Chen *et al.*, 2003; Moore *et al.*, 2003).

Plant HXKs are encoded by a modest family of about 5–10 genes (Claeyssen and Rivoal, 2007). HXK proteins are reported to occur in the cytosol, mitochondria, plastids, nuclei, and Golgi (Balasubramanian *et al.*, 2007, and references therein). AtHXK1 is predominantly associated with the mitochondria, but also reportedly can occur in the nucleus (Cho *et al.*, 2006). There is evidence that from both locations, AtHXK1 can regulate gene and/or protein expression, but there are questions regarding both scenarios (see Balasubramanian *et al.*, 2008). In rice, OsHXK5 and OsHXK6 have been shown recently to act as glc sensors and similarly to have a predominantly mitochondrial association, but possible nuclear function (Cho *et al.*, 2009). However, in contrast to AtHXK1, both OsHXK5 and OsHXK6 do contain a predicted nuclear localization signal.

A recent analysis of the *Arabidopsis* HXK gene family revealed that three of the six members lack catalytic activity when assayed with varying concentrations of glc or fructose (Karve *et al.*, 2008). These were designated as hexokinase-like (HKL) proteins since they also are about 50% identical to AtHXK1. The basis for the lack of catalytic activity in the HKL proteins was attributed to a number of changes throughout the primary sequences and not to any specific single amino acid change. Known functional domains and key residues are reasonably well conserved in AtHKL1 (At1g50460) and AtHKL2 (At3g20040), and both proteins can probably bind glc (Karve *et al.*, 2008). However, sequence divergence in AtHKL3 (At4g37840) is so extensive that the protein might not bind either glc or ATP. Interestingly, all three *Arabidopsis* HKL proteins have a mitochondrial targeting peptide which is very similar to that of AtHXK1. Experimental evidence for their mitochondrial association has been shown by using a proteomics approach (Heazlewood *et al.*, 2004) and by examining the cellular expression of C-terminal GFP fusion proteins (Karve *et al.*, 2008).

Non-catalytic HXKs have been reported in fungi and possibly occur commonly among higher plants (A Virnig and Bd Moore, unpublished data). The fungal HKL proteins have divergent roles including one as a meiosis-specific transcription factor in *Saccharomyces cerevisiae* (Daniel, 2005) and others as regulators of a carbon starvation response in *Aspergillus nidulans* (Bernardo *et al.*, 2007). Despite the reports of the presence of HKL proteins in evolutionarily diverse species, their lack of catalytic activity has made it challenging to define their functions. In this

study, a reverse genetics approach was used to determine whether AtHKL1 might have a role in plant growth, perhaps as an effector of glc signalling. Analyses of phenotypes from gain-of-function *Arabidopsis* plants and from an identified mutant line with a T-DNA insertion in HKL1, show that HKL1 is a negative regulator of plant growth and that it affects seedling growth responses to glc and auxin. However, HKL1 does not affect glc signalling, as shown in protoplast transient expression assays and by seedling candidate gene expression assays. These data indicate that AtHKL1 has an important role in plant growth and development, perhaps by mediating cross-talk between glc and hormone response pathways.

## Materials and methods

### Plant material and growth conditions

Seeds of *Arabidopsis thaliana* ecotype Columbia (Col-0), ecotype Landsberg *erecta* (Ler), and a Col line with a T-DNA insertion within the *HKL1* locus (At1g50460; line WISCDLSLOX383A5; hereafter designated *hkl1-1*) were obtained from the *Arabidopsis* Biological Resource Center (Ohio State University). Seeds of maize (*Zea mays* L.) were purchased (Seed Genetics, Lafayette, IN). Lines for *gin2-1*, *tir1*, and transgenic lines expressing HXK1-HA or HXK1-FLAG were as previously described (Moore *et al.*, 2003). A homozygous line containing the T-DNA insertion in the *HKL1* gene was identified by PCR genotyping using the following primers: p745 (5'-AACGTCCGCAATGTGT-TATTAAGTTG-3') and HKL1A5RP (5'-CCGTGTT-ATCTGAGCCTTACG-3') for the T-DNA insertion allele; and, HKL1A5LP (5'-TGCAAACAAATTTAACGGCTC-3') and HKL1A5RP for the WT allele. The insertion position in the *hkl1-1* mutant was mapped by sequencing the PCR product obtained by the primers L1WLP (5'-TGCAAACAAATTTAACGGCTC-3') and L1WRP (5'-CCGTGTTATCTGAGCCTTACG-3'), using *hkl1-1* genomic DNA as template.

*Arabidopsis* seeds were surface-sterilized and stratified for 2 d at 4 °C as in Jang *et al.* (1997). Plants grown in soil were in a growth chamber (125  $\mu\text{mol m}^{-2} \text{s}^{-1}$ , 22 /20 °C day/night temperature) at either a 12 h photoperiod (normal), an 8 h photoperiod (short day, SD), or a 16 h photoperiod (long day, LD). Plants were also grown for some assays on 1× MS agar plates (modified basal medium with Gamborg vitamins; PhytoTechnology Laboratories, Shawnee Mission, KS) at pH 5.7, normally with 0.5% sucrose, and under constant light (30  $\mu\text{mol m}^{-2} \text{s}^{-1}$ ). For glc repression assays, seedlings were grown on 1× MS plates with a substituted carbon source as 3–7% glc or 3–7% mannitol, for 7 d under constant light. Hypocotyl elongation assays were done at reduced light and nutrients as described before (Moore *et al.*, 2003). For the assay of auxin-induced lateral root formation, *Arabidopsis* seeds were grown on 1× MS plates with 0.5% sucrose plus 5  $\mu\text{M}$  1-naphthylphthalamic acid (NPA) for 5 d and then were transferred to sucrose plates

with or without 0.1  $\mu\text{M}$  naphthalene acetic acid (NAA) for 5 d (Chen *et al.*, 2003).

To perform glc signalling assays by candidate gene expression, 15–20 seedlings were grown in 125 ml flasks containing 50 ml of half-strength MS medium supplemented with 1% sucrose. Seedlings were grown on a rotary shaker at 250 rpm under constant light ( $70 \mu\text{mol m}^{-2} \text{s}^{-1}$ ) at 22 °C for 7 d. Seedlings were then washed with sugar-free half-strength MS medium for 24 h in the dark while shaking, and subsequently transferred to the light in fresh sugar-free medium (control) or in medium plus 2% glc. Seedlings were treated under constant light with shaking for 8 h, and were then harvested by quickly blotting with filter paper before freezing in liquid  $\text{N}_2$ .

### Plasmid constructs

*RBCS-LUC*, *PPDK-LUC*, and *UBQ10-GUS* constructs have been described previously (Schaffner and Sheen, 1991; Balasubramanian *et al.*, 2007). An available clone of *HKL1* with a double haemagglutinin (HA) tag (Karve *et al.*, 2008) was subcloned with a substituted C-terminal FLAG tag in the HBT vector (Moore *et al.*, 2003). Each fusion gene was then transferred into the pCB302 binary vector (*bar* selection marker; Xiang *et al.*, 1999), using *Bam*HI and *Pst*I cloning sites. For cloning the *HKL1* promoter, a 3098 bp fragment upstream of the start codon was PCR amplified using the following primers: L1PGUSFP (5'-CCCAA-GCCTGGGCAGCGAGCTGTCAAAGTGGGA-3') and L1PGUSRP (5'-GCTCTAGATGCCCAAACAGAAC-CAAAAAGACA-3'). The promoter was cloned into the binary vector pSMAB704 (*bar* selection marker; Igasaki *et al.*, 2002), using *Hind*III and *Sma*I cloning sites upstream of the  $\beta$ -glucuronidase (*GUS*) gene. The identities of all clones were verified by DNA sequencing.

Binary constructs were introduced into *Agrobacterium tumefaciens* GV3101 by electroporation. *Arabidopsis* plants of Col-0, *Ler* or *gin2-1* were transformed using the floral dip method (Clough and Bent, 1998). Transformants were selected for herbicide resistance (200  $\mu\text{M}$  glufosinate ammonium; Rely 200, Bayer Crop Science, Kansas City, MO). Seeds of transgenic lines segregating 3:1 for herbicide resistance in the  $T_2$  generation were selected for isolating homozygous lines. Seeds from two or more  $T_3$  lines homozygous for the single insert were used for experiments.

### RT-PCR analysis

Total RNA was isolated from whole seedlings of different lines using the RNeasy plant kit (Qiagen, Germantown, MD). One  $\mu\text{g}$  of total RNA was converted to cDNA using the Protoscript II RT-PCR kit (New England BioLabs, Ipswich, MA). PCR primer sequences for *HXK1*, *HKL1*, and *UBQ5* were described previously (Karve *et al.*, 2008). The expression of a variety of candidate genes was assessed in preliminary experiments by semi-quantitative RT-PCR, based on published data from glc transcript profiling studies (Price *et al.*, 2004). Selected glc regulated genes are a subset

which responded most robustly under the current treatment conditions. The PCR primer sequences for the candidate genes were generated using the AtRTPrimer public database (Han and Kim, 2006): *ASN1* (asparagine synthase1, At3g47340; 5'-TGATTCTCAGGCCAAGAGAGTTCGT-3', 5'-CCCAACCAATGTAGAGCGAAGTGAC-3', expected size=413 bp), *T6P* (trehalose 6-phosphate synthase8, At1g70290; 5'-AGCTCCATTGTTCAAGATCCAAGCA-3', 5'-GCTCCCCGCGTTCTACCATTCTC-3', expected size=626 bp), and *GLYK* (glycerate kinase, At1g80380; 5'-TTGGTGCGAAGATCAGATTGCTTTG-3', 5'-GGAGACAGCATCGCATTAGTTTGC-3', expected size=544 bp). All the primers were designed to span one or more introns such that the amplicon size from cDNA would be different than that from genomic DNA. The template amounts were first titrated to balance the *UBQ5* expression in different samples (using densitometry), and corresponding template amounts were used thereafter, while varying PCR cycle numbers.

### Immunoblots and gluokinase activity assays

Total soluble proteins were extracted as described by Karve *et al.* (2008). The protein concentration in the leaf extracts was measured by Coomassie Blue (Bio-Rad, Hercules, CA). Equal amounts of proteins were electrophoresed by SDS-PAGE and transferred onto Immobilon-P membrane (Millipore, Bedford, MA). The membranes were probed with monoclonal anti-HA (Roche, Indianapolis, IN) or anti-FLAG  $\text{M}_2$  (Sigma-Aldrich, St Louis, MO) antibodies, then incubated with HRP conjugated secondary antibody, followed by chemiluminescence reagents (SuperSignal West Pico, Pierce Biotechnology, Rockford, IL) and detection by film (Blue X-ray, Phenix Research Products, Candler, NC). Gluokinase activity was measured directly from leaf extracts or from lysates of maize protoplasts transfected with the indicated plasmids (Karve *et al.*, 2008).

### Protoplast transient expression assays

Leaves of greening maize seedlings or *Arabidopsis* plants (Col-0 or *hkl1-1*) were used as a source of protoplasts for protein expression and signalling assays (Jang and Sheen, 1994; Hwang and Sheen, 2001). Protoplasts were transfected (Yoo *et al.*, 2007) with promoter constructs for *RBCS-LUC* (4  $\mu\text{g}$ ) or *PPDK-LUC* (6  $\mu\text{g}$ ), and with *UBQ10-GUS* (2  $\mu\text{g}$ ) as an internal control (Balasubramanian *et al.*, 2007). Protoplasts were co-transfected as indicated with effectors *HXK1-HA* (6  $\mu\text{g}$ ) and/or *HKL1-HA* (8  $\mu\text{g}$ ). Transfection efficiencies were routinely >60%, as determined using WRKY-GFP (Balasubramanian *et al.*, 2007). An empty vector was included to maintain a balanced concentration of DNA during transfections. Following transfection, protoplasts were incubated in the dark for 90 min, then treated with 2 mM glc and incubated in the light for 6–8 h at  $30 \mu\text{mol m}^{-2} \text{s}^{-1}$ . Protoplasts were collected by low speed centrifugation. After resuspending in lysis buffer, *GUS* and *LUC* activities were measured as described previously (Balasubramanian *et al.*,

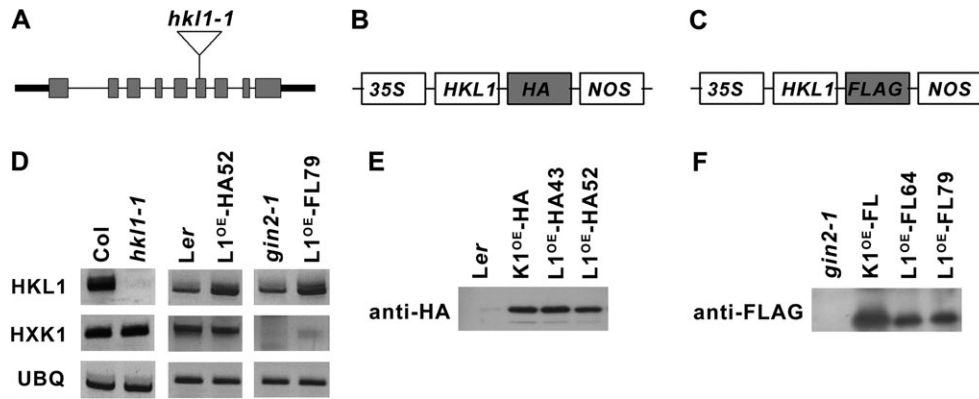

**Fig. 1.** Molecular characterization of *Arabidopsis* HKL1 mutant and transgenic lines. (A) Schematic diagram showing the gene structure of *HKL1* (At1g50460). Exons are indicated by grey rectangles, introns are indicated by the thinner lines. The location of the T-DNA insertion in *hkl1-1* is shown with the open triangle. (B, C) Design of plasmid constructs used to transform *Arabidopsis* lines. *HKL1*-HA was used to transform *Ler* and *HKL1*-FLAG was used to transform *gin2-1*. Boxes are not drawn to scale. 35S, CaMV promoter; NOS, nopaline synthetase terminator; HA, 2 copies of the 10 amino acid haemagglutinin tag; FLAG, 1 copy of the 8 amino acid FLAG tag. (D) Transcript expression of *HKL1* and *HXK1* by semi-quantitative RT-PCR: Col and *hkl1-1*; *Ler* and *HKL1*-HA line 52; and *gin2-1* and *HKL1*-FLAG line 79. *AtUBQ5* mRNA was used as a control for the amount of template. PCR cycle numbers for *HKL1*, *HXK1*, and *UBQ* were 33, 30, and 30, respectively.  $L1^{OE}$ , *HKL1* overexpression. (E) Immunoblot analysis using anti-HA antibody and 1  $\mu$ g protein from leaf extracts of *Ler*, *HXK1*-HA transgenic ( $K1^{OE}$ -HA), and two *HKL1*-HA lines. (F) Immunoblot analysis using anti-FLAG antibody and 1  $\mu$ g protein from leaf extracts of *gin2-1*, *HXK1*-FLAG transgenic ( $K1^{OE}$ -FL), and two *HKL1*-FLAG lines.

2007). Promoter activities are expressed as relative LUC/GUS values, normalized to control samples, which had no added glc.

#### Histochemical GUS staining and fluorometric GUS assays

Histochemical staining of transgenic *Arabidopsis* plants expressing the *pHKL1*-GUS fusion construct was performed as described by Crone *et al.* (2001). The plant tissue was incubated in GUS staining buffer containing 25 mg ml<sup>-1</sup> of X-Glc (Gold BioTechnology, St Louis, MO) for 2–4 h and destained with 95% ethanol for 6–8 h. For measuring total extractable GUS activity, seedlings were extracted in buffer containing 50 mM NaH<sub>2</sub>PO<sub>4</sub> (pH 7.0), 10 mM EDTA, 0.1% Triton X-100, 0.1% sodium lauryl sarcosine, and 10 mM  $\beta$ -mercaptoethanol. The enzymatic reaction was carried out in 100  $\mu$ l of extraction buffer plus 1 mM 4-methyl umbelliferyl glucuronide (MUG, Sigma-Aldrich) at 37 °C for the indicated times, before stopping with 300  $\mu$ l of 0.2 M Na<sub>2</sub>CO<sub>3</sub>. Fluorescence was measured in a 96-well microtitre plate format using a GENios spectrophotometer (Phenix Research Products) at a 360 nm excitation wavelength and a 465 nm emission wavelength. Sample GUS activities were calculated from a standard curve made using 0.1–1  $\mu$ M 4-methyl-umbelliferone (Sigma-Aldrich).

In one experiment, transgenic seeds expressing *pHKL1*-GUS were grown on 1 $\times$  MS plates plus 0.5% sucrose for 7 d, then transferred to liquid MS medium for 4 h with 10  $\mu$ M indoleacetic acid (IAA), 1  $\mu$ M abscisic acid (ABA), 50  $\mu$ M 1-aminocyclopropane-1-carboxylic acid (ACC), or 10  $\mu$ M zeatin (all from Sigma-Aldrich). Both treated and

control seedlings were analysed for GUS staining and extractable GUS activity as described above.

#### Light microscopy

Light microscopy was used to view and capture images for routine seedling pictures, as well as for the GUS-stained seedlings or tissues, using a Nikon SMZ1500 stereo microscope (Nikon Instruments Inc., Melville, NY) with a MicroPublisher CCD cooled colour camera and Image Pro Plus v5.0 software (Media Cybernetics, Bethesda, MD). For measuring the hypocotyl lengths, the stereomicroscope was calibrated throughout the magnification range, using a stage micrometer.

## Results

### Molecular characterization of *HKL1* knockout and increased expression lines

To understand the biological role of AtHKL1, a functional genomics approach was used by examining phenotypes of mutant and transgenic lines with altered HKL1 protein expression level. Seeds of a T-DNA insertion line for AtHKL1, generated by the University of Wisconsin knockout facility, were obtained through ABRC. Homozygous knockout plants with a possible single insert were identified by PCR screening. The T-DNA insertion was shown using real-time PCR and the 2<sup>- $\Delta\Delta C_t$</sup>  method of relative quantification (Ingham *et al.*, 2001) to be present as a single copy (see Supplementary Fig. S1 at *JXB* online), as shown by the dilution series values close to 1. The insertion site was mapped to exon VI of *HKL1* (Fig. 1A). Using semi-quantitative

RT-PCR, the mutant line was found to have no detectable HKL1 transcript (Fig. 1D). This line was designated *hkl1-1*.

Transgenic *Arabidopsis* plants that constitutively express HKL1 in different genetic backgrounds were made: HKL1-HA expressed in *Ler* or HKL1-FLAG expressed in *gin2-1* (Fig. 1B, C). This was done in order to distinguish possible HKL1 dependent phenotypes in relation to HXK1 expression. Three independent homozygous lines were obtained for the HKL1-HA transformants and seven lines for the HKL1-FLAG transformants. Representative transformed lines had substantially increased HKL1 transcripts, relative to each respective parental line (Fig. 1D). Notably, the HXK1 mRNA abundance was not altered in *hkl1-1* or in transformed *Ler* lines which expressed HKL1-HA. The transformed lines with HKL1-FLAG did not have HXK1 transcripts, consistent with their parental background being *gin2-1*.

Western blot analysis of leaf extracts was carried out using antibodies to the introduced epitope tags (Fig. 1E, F). All of the transgenic lines expressed the corresponding tagged protein, while the parental lines did not. Positive controls included transgenic lines that expressed either HA or FLAG-tagged forms of HXK1 protein. From these assays, the two indicated lines expressing each construct were selected for further phenotypic analyses, with data presented for HKL1-HA line 52 and for HKL1-FLAG line 79.

#### Growth phenotypes of HKL1 knockout and increased expression lines

To test whether the HKL1 protein has a discernible function in plant growth, the different experimental lines were grown under different conditions. When grown on agar plates with 0.5% sucrose, the HKL1-HA seedlings were distinctly smaller than were the parental *Ler* seedlings, as were the *gin2-1* seedlings (Fig. 2A). However, expression of HKL1 in the *gin2-1* background had no apparent effect on seedling growth. Growth of *hkl1-1* seedlings on sucrose plates resembled growth of the parental Col-0 seedlings. These results indicated that HKL1 might be a negative regulator of plant growth when overexpressed in the *Ler* background.

Transgenic and mutant lines also were grown in soil under different light conditions. When grown under SD conditions, both HKL1 overexpression lines had normal growth, when compared with control plants (Fig. 2). However, the *hkl1-1* plants under SD conditions were somewhat smaller than control plants, with a rosette diameter reduced by about 20% (Fig. 2B, C). Growth of the *hkl1-1* plants under LD conditions was similar to Col-0. By contrast, growth of the overexpression lines in either *Ler* or *gin2-1* backgrounds was considerably reduced under LD conditions. For example, the rosette diameter for HKL1-HA plants was 50% smaller than for *Ler* plants. This resulted in mature plants of the transgenic line being about 4-fold smaller. Also, the diameter of HKL1-FLAG plants was reduced by 25% compared to *gin2-1* plants, resulting in almost a 2-fold decrease in plant size. The reduced rosette sizes were not associated with a change in leaf numbers at

the time of flowering for the different transformants relative to control lines (Fig. 2D), or with a change in the time to flowering (data not shown). These observations indicate that the intrinsic developmental programme was not changed due to increased HKL1 protein expression. However, seed yield from the small plants was greatly reduced, but not seed viability. Notably then, HKL1 overexpression in the *Ler* background resulted in an even smaller plant than when overexpressed in the absence of HXK1 protein in the *gin2-1* background (see Supplementary Fig. S2 at *JXB* online).

#### Seedling hypocotyl growth among different HKL1 expression lines

Since *Arabidopsis* hypocotyl growth is sensitive to many endogenous factors that regulate plant cell elongation (Salchert *et al.*, 1998), the hypocotyl growth of 7-d-old seedlings grown vertically on plates under constant low light conditions was measured (Fig. 3). The average hypocotyl length of HKL1-HA seedlings was about 50% less than of the parental *Ler* seedlings. On the other hand, *hkl1-1* seedlings had a 40% increase in hypocotyl length relative to Col-0 seedlings. The average hypocotyl length of *gin2-1* seedlings was about 45% less than that for *Ler* seedlings. However, HKL1-FLAG seedlings did not show any significant change in hypocotyl growth when compared with the parental genotype, *gin2-1*. By this assay, HKL1 again was a negative regulator of seedling growth when expressed in a WT background, which contains HXK1.

#### Auxin-induced lateral root formation among different Arabidopsis lines

The reduced hypocotyl growth of *gin2-1* seedlings was previously linked to its being relatively insensitive to auxin (Moore *et al.*, 2003). Therefore, the different transgenic and mutant lines were also tested by an auxin assay for lateral root formation. In this assay, seedling growth in the presence of the auxin transport inhibitor NPA greatly reduces the number of lateral roots (Himanen *et al.*, 2002). Lateral root formation can then be initiated after seedling transfer to plates with NAA. With these treatments, both Col-0 and *Ler* seedlings showed a robust induction of lateral root formation, increasing 5-fold and 4-fold, respectively, after transfer to plates with NAA (Fig. 4). Seedlings of *hkl1-1* showed a similar increase in their number of lateral roots relative to Col-0 seedlings. However, auxin treatment induced relatively fewer lateral roots in *gin2-1*, HKL1-HA, and HKL1-FLAG seedlings, about a 2-fold increase. As a control for this assay, the same treatments of the auxin receptor mutant *tir1* (Col background) did not appreciably induce any lateral roots, with the *tir1* mutant having fewer roots even than *gin2-1* or the two HKL1 overexpression lines. These data indicate that HXK1 has a significant role in the auxin induction of lateral roots and that HKL1 blocks this induction response to a level comparable with that observed in the absence of HXK1.

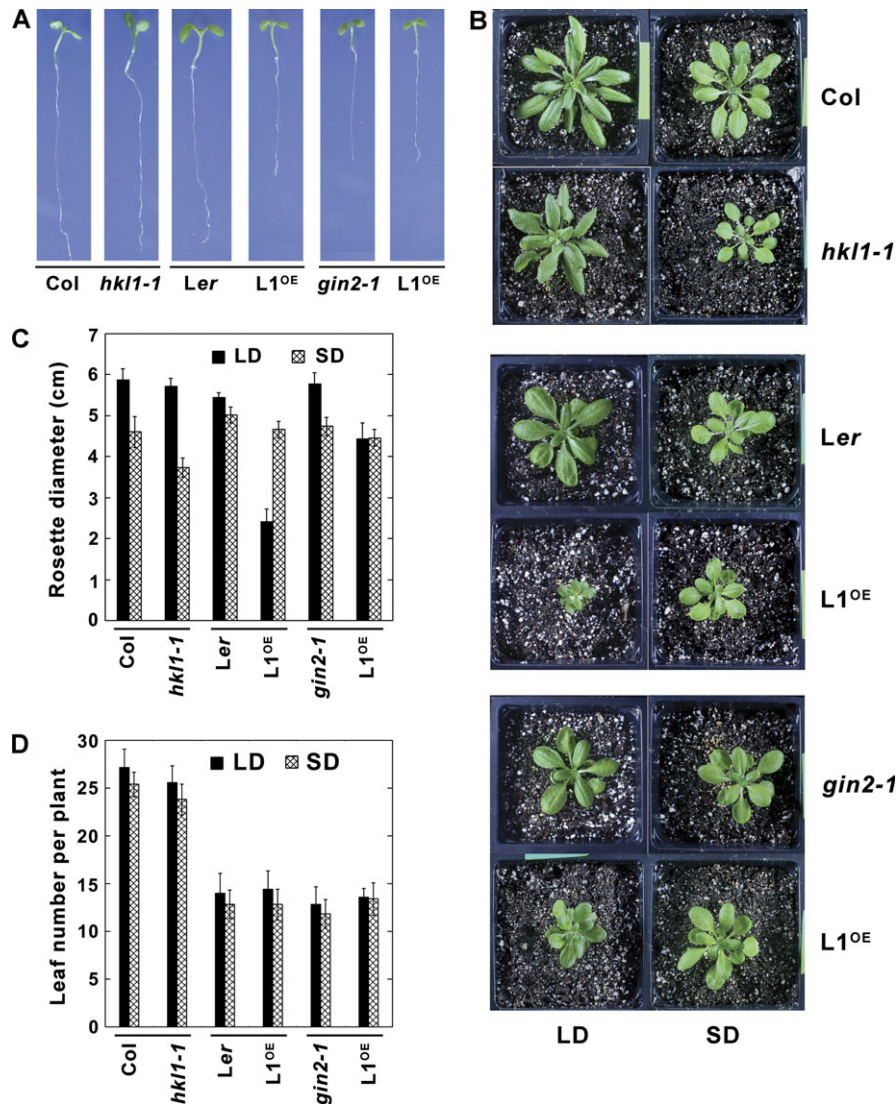

**Fig. 2.** Growth phenotypes of HKL1 mutant and transgenic lines. Dark bars indicate corresponding parental controls and modified lines. (A) Seven-day-old seedlings on  $1 \times$  MS plates+0.5% sucrose. (B) Plants grown 30 d in a growth chamber under 8 h (short day, SD) or 16 h (long day, LD) photoperiods. (C) Average rosette diameter (cm) after 30 d  $\pm$ SD,  $n=10$ . The difference in average diameters of Col and *hkl1-1* plants under SD conditions is statistically significant by a 2-tailed *T* test at  $P > 0.95$ . (D) Average leaf number per plant at the time of bolting  $\pm$ SD,  $n=10$ .

#### Glucokinase activities and glc signalling assays using different expression lines

The growth phenotypes of the HKL1 transgenic and mutant lines that have been described could be due to an influence of HKL1 protein on HXK1 protein catalytic activity, on HXK1 signalling functions, and/or on the function of an unknown protein. To test for the possible influence of HKL1 protein on glucokinase activity, rate measurements were carried out using leaf extracts from the different lines. There was no significant difference for enzyme activities between the transgenic lines and their respective control lines (Fig. 5A). As reported previously, HXK enzyme activity in *gin2-1* is about one-half of that in *Ler* (Moore *et al.*, 2003) and HKL1-HA did not have any glc phosphorylation activity (Karve *et al.*, 2008). The possible inhibition of HXK1 by HKL1 was also tested after

transiently expressing HXK1-HA and HKL1-HA in maize protoplasts. However, HKL1 protein did not affect the measured glucokinase activity (Fig. 5B).

Since HKL1 lacks glucokinase activity, but has a largely conserved glc binding domain, it is possible that, instead, the protein affects glc signalling activities. A widely used screen to identify mutants in glc signalling is based on the ability of some mutants to develop normally on otherwise inhibitory concentrations of exogenous glc (Rolland *et al.*, 2006). Therefore, seedling growth of the different lines was assessed in the presence of varying glc concentrations (Fig. 6A, B; see Supplementary Fig. S3 at *JXB* online). At relatively high glc levels, Col-0 and *Ler* seedlings underwent developmental arrest, with much reduced root and shoot growth, and did not accumulate chlorophyll. The *hkl1-1* seedlings were hypersensitive to developmental arrest, showing substantial repression even on 4% glc. By contrast, the HKL1-HA

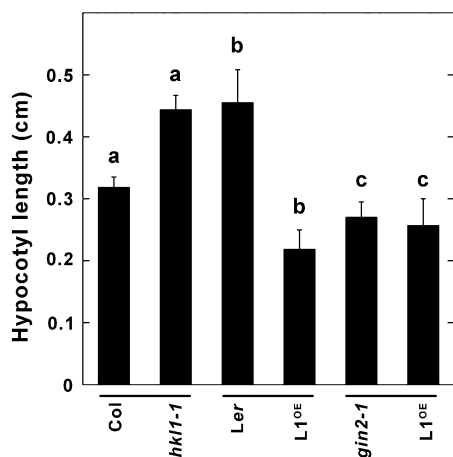

**Fig. 3.** Average seedling hypocotyl length of HKL1 mutant and transgenic lines. Seedlings were grown vertically for 7 d on 1/5× MS plates under constant light ( $15 \mu\text{mol m}^{-2} \text{s}^{-1}$ ) at 22 °C. Values are means  $\pm$ SD,  $n=15$ . a, b, by 2-tailed *T* tests, values are statistically different at  $P > 0.95$ ; c, values are not different at  $P > 0.95$ .

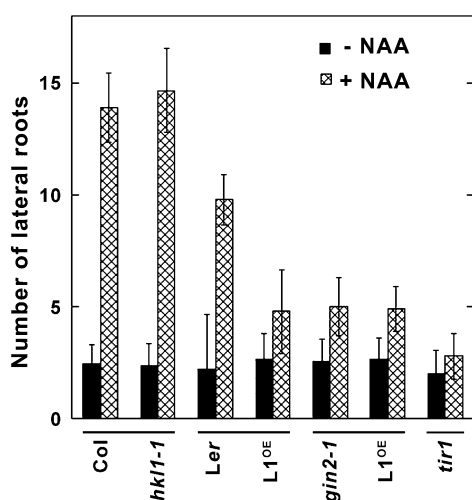

**Fig. 4.** Auxin-induced lateral root formation in seedlings of HKL1 mutant and transgenic lines. The number of lateral roots were counted 5 d after seedling transfer from plates with 5  $\mu\text{M}$  NPA to plates with or without 0.1  $\mu\text{M}$  NAA. Values are average lateral root numbers  $\pm$ SD,  $n=10$ .

seedlings were glc-insensitive relative to the *Ler* control line. When grown on 6% glc, >90% of the HKL1-HA seedlings have green cotyledons versus 0% of the *Ler* seedlings. The responses of HKL1-FLAG seedlings were comparable with those of *gin2-1* seedlings. As an osmotic control, all lines were shown to have a similar phenotype on MS plates with 6% mannitol (Fig. 6C). Also, mannitol did not repress cotyledon greening in any of the lines (Fig. 6D). The observed glc-dependent phenotype suggested that HKL1 could be a negative regulator of glc signalling.

To test whether HKL1 might have a role in glc signalling, protoplast transient expression assays were carried out

using p*RBCS*-LUC and p*PPDK*-LUC as established reporters of HKK1 signalling (Balasubramanian *et al.*, 2007). Leaf protoplasts of Col-0 and *hkl1-1* plants were used in independent assays. Relative *RBCS*-driven LUC activities expressed in protoplasts of either genotype was reduced by 25% with 2 mM glc (Fig. 7A). In both cases, co-transfection with HKK1 plus treatment with 2 mM glc reduced the reporter activity by about 55%. By contrast, transfected HKL1 did not affect the relative expressed *RBCS*-driven LUC activity with glc alone or with HKK1 plus glc, using protoplasts from either wild-type or mutant leaves. Similar results were obtained using p*PPDK*-LUC (data not shown). Notably, in all cases the expression of p*UBQ10*-GUS was not affected by co-transfection of HKK1, HKL1 and/or by addition of 2 mM glc.

To complement the transient expression assays, an alternate assay of glc signalling was carried out using seedlings grown in liquid culture and treated with or without 2% glc for 8 h. The selected *GLYK* and *T6P* genes are thought to be regulated by HKK1-dependent glc signalling, and *ASN* by a glycolysis-dependent glc signalling pathway (Price *et al.*, 2004). Supporting this interpretation, transcripts of *ASN*, *GLYK*, and *T6P* were all repressed by glc treatment of Col-0 and *Ler* seedlings, while *GLYK* and *T6P* mRNA abundance were not affected by treatment of *gin2-1* seedlings (Fig. 7B). The response of these transcripts was not differentially affected in any of the tested mutant or transgenic lines, relative to the corresponding control lines. These data indicate that HKL1 probably does not affect the commonly recognized transcriptional targets of glc signalling, whether by a HKK1-dependent or a glycolysis-dependent pathway.

#### *HKL1* promoter expression and activity assays

To improve our understanding of possible HKL1 functions, transgenic *Arabidopsis* plants were made that express an *HKL1* promoter-GUS fusion construct (p*HKL1*-GUS). At the early stages of seedling development, GUS staining was detected mainly in the root, particularly towards the root tip (Fig. 8A). With increased seedling growth, GUS staining was progressively localized to the vascular tissues of cotyledons (Fig. 8B), was relatively strong in the root and shoot meristems, but not in leaf primordia (Fig. 8C). In adult plants, GUS expression was highest in the root and leaf vascular tissue, and in the emerging lateral roots (Fig. 8D, E, F). In stem cross-sections, GUS staining was observed in phloem tissue. In flowers, GUS staining was observed in anther filaments, but not in the pistils (Fig. 8G, H). Staining was also observed broadly in developing siliques, becoming localized apparently to the funiculi of more mature seeds (Fig. 8I).

Since HKL1 overexpression reduced the sensitivity of seedlings to auxin-dependent lateral root formation (Fig. 4) and reduced the sensitivity of seedlings to glc repression of development (Fig. 6), the influence of short-term treatment of seedlings with different hormones was examined on the expression of p*HKL1*-GUS activity (Fig. 9). The effect of

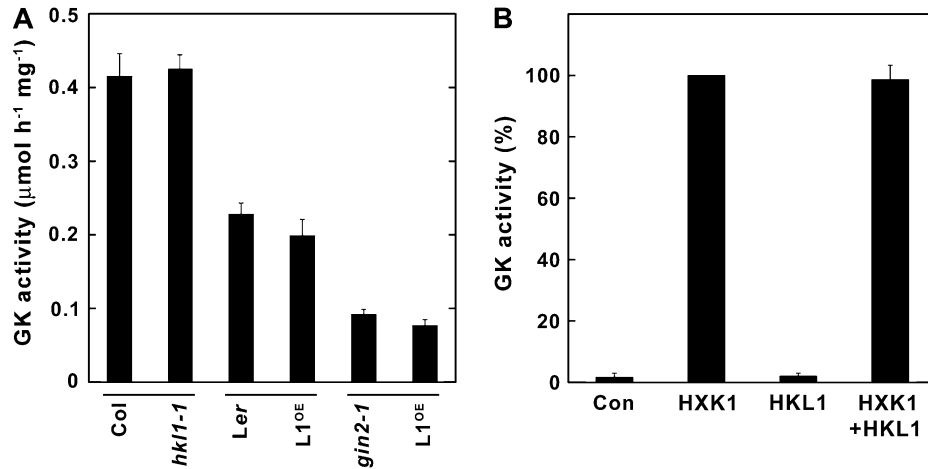

**Fig. 5.** Glucokinase activity of HKL1 mutant and transgenic lines. (A) Clarified leaf extracts of greenhouse-grown plants were assayed directly for enzyme activity. Values are means  $\pm$ SD,  $n=3$ . (B) Maize protoplast extracts were assayed for enzyme activity after expression of plasmids with HXK1-HA and/or HKL1-HA. Protein expression was routinely monitored by labelling with [ $^{35}\text{S}$ ]-methionine (data not shown; as in Karve *et al.*, 2008). Values are means  $\pm$ SD,  $n=3$ , expressed relative to control protoplasts with empty vector DNA only.

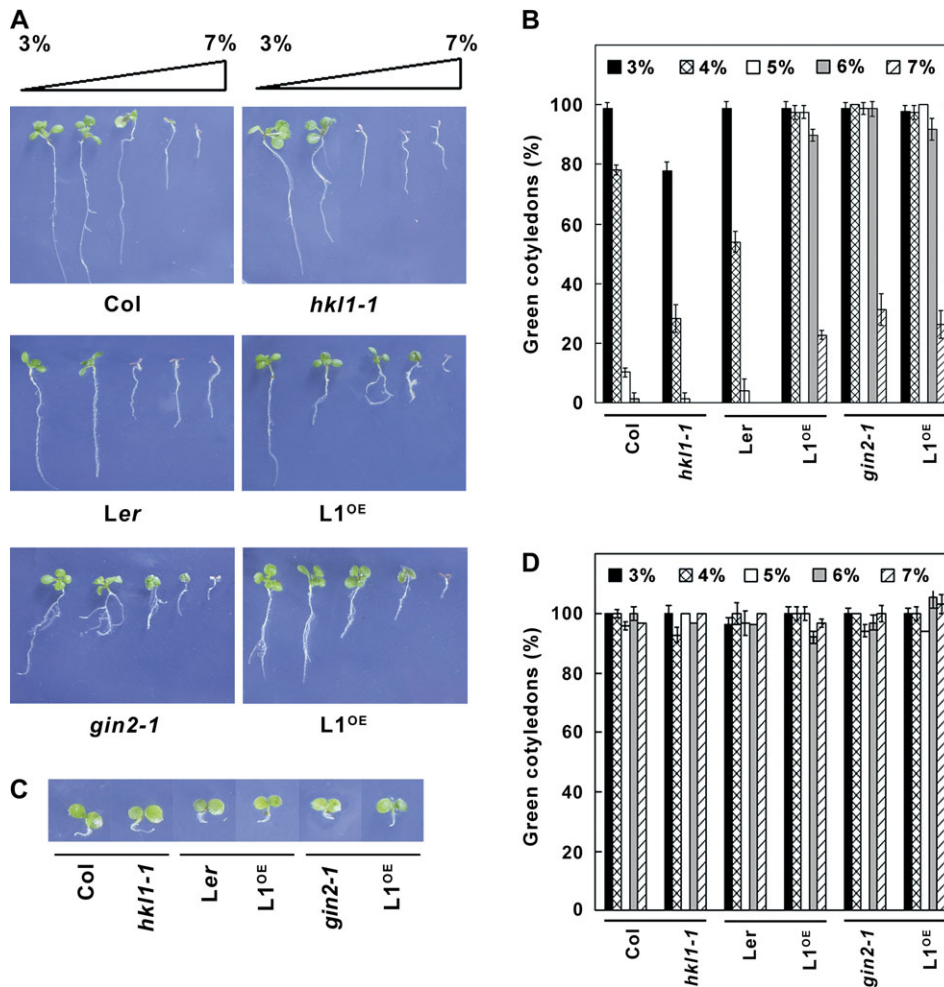

**Fig. 6.** Phenotypes of HKL1 mutant and transgenic lines grown on agar plates with 3–7% glc. (A) Images are representative 7-d-old seedlings. (B) Percentage of seedlings in (A) at corresponding glc concentrations which had green cotyledons. Values are expressed relative to the total number of germinated seedlings (30–40), as means  $\pm$ SD,  $n=3$ . (C) Images of representative 7-d-old seedlings grown on agar plates with 6% mannitol. (D) Percentage of seedlings in (C) at corresponding mannitol concentrations which had green cotyledons. Values are expressed relative to the total number of germinated seedlings, as means  $\pm$ SD,  $n=3$ .



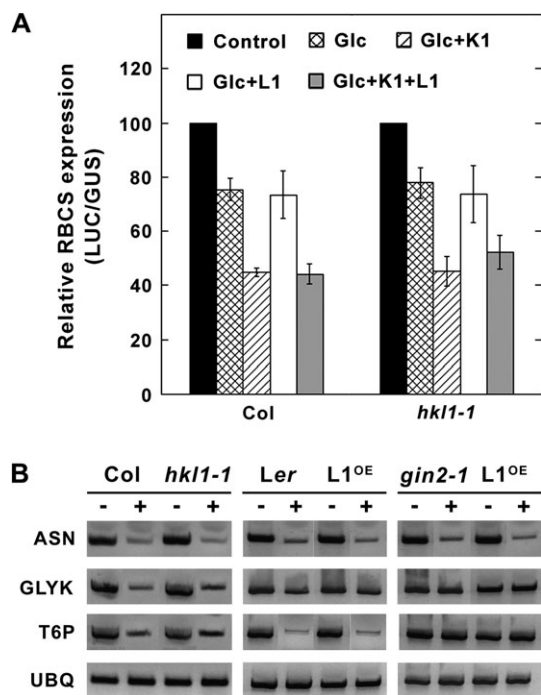

**Fig. 7.** Glc signalling assays. (A) Transient expression assays using leaf protoplasts from WT Col or *hkl1-1*. Protoplasts were co-transfected with pRBCS-LUC and an internal control, pUBQ10-GUS, plus or minus effectors HXK1-HA and/or HKL1-HA. Protoplast treatments include without glc or effectors (Control), with 2 mM glc (Glc), with 2 mM glc+HXK1-HA (Glc+K1), with 2 mM glc+HKL1-HA (Glc+L1), and with 2 mM glc+HXK1-HA+HKL1-HA (Glc+K1+L1). Values are means  $\pm$ SD of the relative LUC units to GUS activities for replicated assays normalized to the control. GUS activity was not affected by the presence of glc or either effector. (B) Expression of glc regulated genes in HKL1 transgenic lines and mutants. Semi-quantitative RT-PCR was used to determine the transcript levels of asparagine synthase (ASN), glycerate kinase (GLYK), trehalose 6-phosphate synthase (T6P), and ubiquitin (UBQ). Seedlings grown in liquid medium were challenged without (-) or with (+) 2% glc for 8 h (see Materials and methods for further details). The number of PCR cycles was varied in each case, but for the presented data are as follows: ASN, 32 cycles, GLYK, 32 cycles, T6P, 33 cycles, UBQ, 31 cycles.

the hormone treatments was determined visually and also quantitatively after extraction and assay of GUS activity. For the latter, initial assays in the absence of added stimuli established that a 2 h reaction time with seedling extracts was within the linear range of activity (Fig. 9B). IAA treatment (or GA<sub>3</sub> treatment, data not shown) did not induce pHKL1-GUS expression or enzyme activity (Fig. 9A, C). However, ABA treatment greatly reduced seedling GUS staining and reduced the extractable GUS activity by 50%. On the other hand, zeatin or ACC treatments induced GUS expression throughout the seedling and not just in the vascular tissue. Correspondingly, the extracted GUS activities following these treatments increased up to 2-fold relative to the control treatment. The results of the GUS assays indicate that *AtHKL1* might be regulated by multiple

plant hormones and, thereby, could have a regulatory role in plant growth and development.

## Discussion

Non-catalytic HXKs have been identified in fungi including *S. cerevisiae* and *A. nidulans* (Daniel, 2005; Bernardo *et al.*, 2007) and also in *Arabidopsis* (Karve *et al.*, 2008). Whether non-catalytic homologues of known enzymes are commonly present in other protein families is not known. The *Arabidopsis* glutathione transferase family does include both non-catalytic as well as catalytic forms, although their relative distribution between the groups apparently has not been strictly determined (Dixon *et al.*, 2003). Recently,  $\beta$ -amylase4 (BAM4) of *Arabidopsis* was shown to lack apparent catalytic activity, yet somehow to facilitate starch breakdown (Fulton *et al.*, 2008). BAM4 is one of perhaps four chloroplastic isoforms within *Arabidopsis*. Also, the plant shikimate kinase gene family includes two non-catalytic homologues which have been present in all major plant lineages for over 400 million years (Fucile *et al.*, 2008). In *Arabidopsis*, these express novel functions, one of which is required for chloroplast biogenesis (Fucile *et al.*, 2008). Non-catalytic enzyme homologues might occur somewhat more often among plant gene families than what is currently appreciated, since sequence divergence levels within families are often >25%. That is, in order to transfer all four digits of an EC number at an error rate below 10%, the estimated level of sequence identity needs to be >75% (Rost *et al.*, 2003). It is suggested that when non-catalytic homologues of known enzymes do occur, they are likely to have important regulatory functions. For example, several catalytically inactive homologues of phosphoinositide 3-phosphatases have been linked to specific human diseases (Robinson and Dixon, 2006).

As one general approach to understand protein function, the tissue expression pattern and regulation of gene expression can provide an important physiological context. The *AtHKL1* transcript was previously shown to be expressed in the principal plant organs (Karve *et al.* 2008). These observations have been extended in this study by demonstrating that pHKL1-GUS activity occurs predominantly in the vascular tissues of different sink organs such as roots, stems, and anthers (Fig. 8). In stem cross-sections, the vascular staining was associated with phloem tissue. While we are not aware of any HXK family members having been reported in surveys of the phloem proteome, nonetheless many phytohormones and a number of regulatory proteins have been detected in phloem sap (Giavalisco *et al.*, 2006). The HKL1 promoter activity was also found to be influenced by several phytohormones, including being repressed by ABA and induced by both ACC and cytokinin. Hormone induction of the HKL1 promoter occurred in both vascular and non-vascular tissues (Fig. 8). Our analysis of the HKL1 promoter sequence for known regulatory elements (Higo *et al.*, 1999; Molina and Grote-wold, 2005; Obayashi *et al.*, 2007) indicates that the

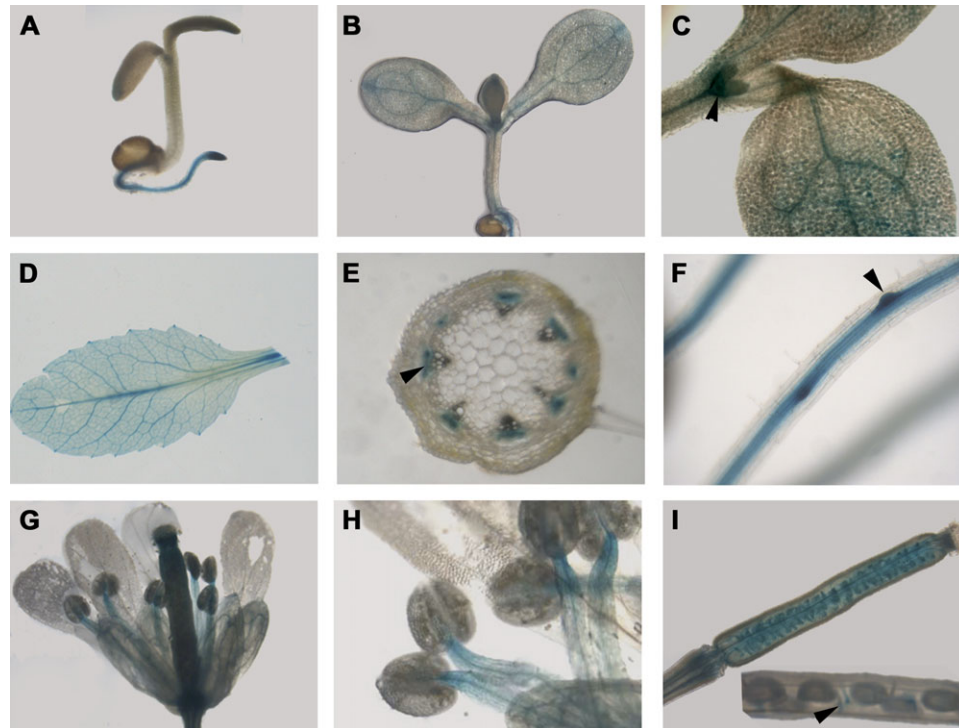

**Fig. 8.** Organ and tissue expression of *pHKL1-GUS*. (A) Seedlings grown for 3 d on MS plates. (B) Seedlings grown for 7 d on MS plates. (C) Shoot of a 5-d-old seedling, with the arrowhead pointing to specific stain in the meristem. (D) Leaf from a 21-d-old plant. (E) Stem cross-section, with the arrowhead pointing to staining of phloem. (F) Root of a 10-d-old seedling, with the arrowhead pointing to enhanced staining at the site of lateral root initiation. (G) Opened flower. (H) Anthers and filaments. (I) Developing silique, with insert showing a mature silique and an arrowhead pointing to the funiculus of a developing seed.

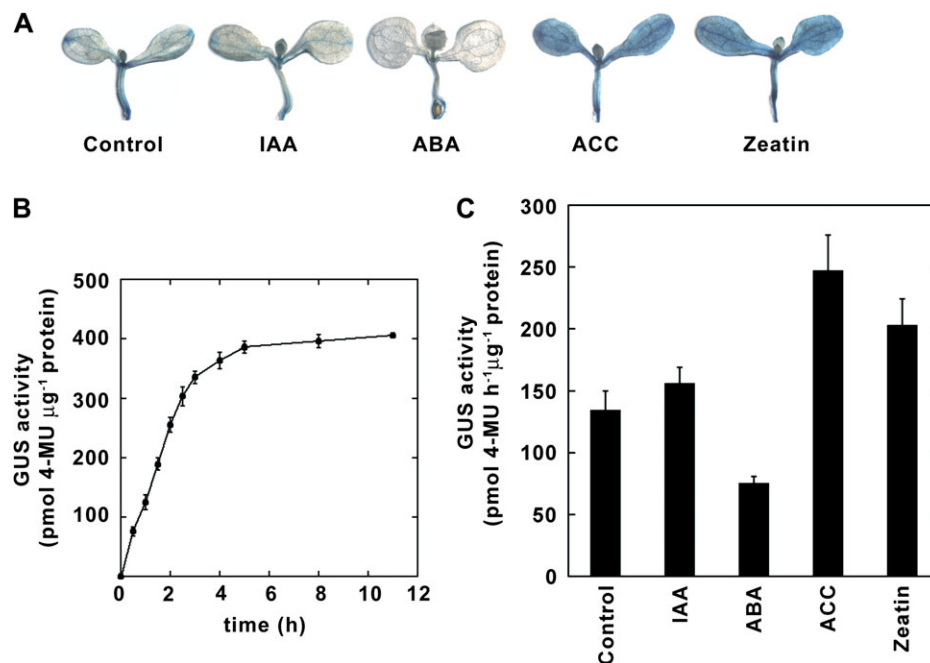

**Fig. 9.** Effect of different plant hormones on *pHKL1-GUS* expression. Seedlings of *pHKL1-GUS* lines were grown for 7 d on MS plates, then transferred to liquid MS medium for 4 h with different plant hormones: control (no additions), 10  $\mu\text{M}$  IAA, 1  $\mu\text{M}$  ABA, 50  $\mu\text{M}$  ACC, and 10  $\mu\text{M}$  zeatin. (A) Seedlings stained for GUS activity. (B) Reaction time-course for GUS activity assayed from control seedlings. (C) GUS activity of seedlings after a 2 h reaction. Values are means  $\pm$ SD,  $n=3$ .

promoter does have motifs proposed to be regulated by several hormones (data not shown).

Phenotypes of the AtHKL1 overexpression lines provide evidence that the HKL1 protein is a negative regulator of plant growth. HKL1 overexpression in *Ler* (HKL1-HA) resulted in reduced seedling growth on sucrose plates (Fig. 2), reduced hypocotyl elongation under low light conditions (Fig. 3), severely reduced rosette size under LD conditions (Fig. 2), and a decreased sensitivity to auxin-induced lateral root formation (Fig. 4). In a recent initial report, some rice HXK family members also were considered to be possible negative regulators of seedling growth (Yu and Chiang, 2008). The status of the *glc* binding domain in possible regulatory HXKs needs to be evaluated experimentally. It has previously been shown that AtHXK1-G173A has a 90% decrease in *glc* phosphorylation activity (Karve *et al.*, 2008). Since AtHKL1 has the same recognized *glc* binding domain as does this mutated protein, we speculate that *glc* binding affinity is reduced in AtHKL1, but not eliminated. Thus, for a negative regulator, decreased *glc* binding affinity could be a feedback mechanism to limit plant growth in the presence of excessive carbohydrate availability.

The HKL1 protein might function as a negative regulator of cell expansion, based on reduced hypocotyl growth of HKL1-HA seedlings and on increased hypocotyl growth of the *hkl1-1* seedlings (Fig. 3). Seedling hypocotyl growth by cell elongation integrates diverse signals including light, temperature, nutrients, and most plant hormones (Collett *et al.*, 2000; De Grauwe *et al.*, 2005). In *gin2-1*, reduced hypocotyl growth has been attributed to the possible insensitivity of seedlings to auxin signalling (Moore *et al.*, 2003). However, ethylene also can repress hypocotyl elongation in seedlings grown under conditions similar to those in our experiment (Smalle *et al.*, 1997). Thus, it is possible that HKL1 expression promotes ethylene sensitivity instead of attenuating auxin sensitivity. Consistent with this possibility, while lateral root formation does require auxin synthesis, transport, and/or signalling (Casimiro *et al.*, 2003), enhanced ethylene signalling has more recently been shown to repress lateral root formation by modulating auxin transport (Negi *et al.*, 2008). Thus, the observed HKL1 repression phenotype for auxin-induced root formation (Fig. 4) might instead be associated with an altered ethylene response. Further experiments are needed to clarify the mechanisms involved.

The mode of action of AtHKL1 is not known, but does merit further consideration. On the one hand, since both HXK1 and HKL1 are targeted to mitochondria (Heazlewood *et al.*, 2004; Karve *et al.*, 2008), the two proteins have the potential to interact such that HKL1 could act as a dominant negative effector. In this case, the overexpression of HKL1 in the *gin2-1* background might not result in a novel phenotype relative to its overexpression in the presence of HXK1. Assay results for hypocotyl growth (Fig. 3), for auxin induction of lateral root growth (Fig. 4), and for *glc* tolerance (Fig. 6) are consistent with this possibility. Furthermore, the contrasting phenotypes observed by these assays with the *hkl1-1* mutant also support this interpreta-

tion. On the other hand, the overexpression of HKL1 in WT did result in a much more diminutive plant under LD conditions than was observed in *gin2-1* (Fig. 2). This implies that HKL1 could have a more complicated mode of action by also independently affecting one or more targets possibly involved in mediating phytohormone responses.

In summary, the present results indicate that the non-catalytic AtHKL1 protein can negatively influence plant growth, possibly by somehow influencing cross-talk between *glc* and other plant hormone response pathways. Elucidating the functions of non-catalytic proteins will be an ongoing challenge for contemporary biologists.

## Supplementary data

Supplementary data are available at *JXB* online.

**Supplementary Fig. 1.** The number of T-DNA insertions in *hkl1-1* as determined by real time PCR.

**Supplementary Fig. S2.** Growth under 16 h (long day) photoperiod conditions of transgenic *Arabidopsis* expressing HKL1 protein in different genetic backgrounds.

**Supplementary Fig. S3.** Growth response on agar plates with varying *glc* concentrations for the transgenic HKL1-Flag line 43.

**Supplementary Fig. S4.** Transcript abundance by semi-quantitative RT-PCR of HXK1 and HKL1 from *Ler* seedlings grown on plates with 0.5% sucrose (–) or with 6% glucose (+).

## Acknowledgements

We very much appreciate technical help from Ms Xiaoxia Xia. We thank Dr Zhou Li and Dr Jen Sheen for sharing their initial observations on the relative auxin insensitivity for lateral root induction in *gin2-1*. We also thank Dr J-C Jang for useful discussions on seedling *glc* signalling assays. This paper is technical contribution no. 5642 of the Clemson University Experiment Station. This material is based upon work supported by the CSREES/USDA, under project number SC1700190. Any opinions, findings, conclusions or recommendations expressed in this publication are those of the author(s) and do not necessarily reflect the view of the USDA.

## References

- Balasubramanian R, Karve A, Kandasamy M, Meagher RB, Moore B.** 2007. A role for F-actin in hexokinase-mediated glucose signaling. *Plant Physiology* **145**, 1423–1434.
- Balasubramanian R, Karve A, Moore B.** 2008. Actin-based framework for cellular glucose signalling by *Arabidopsis* hexokinase1. *Plant Signaling and Behavior* **3**, 322–324.
- Bernardo SM, Gray KA, Todd RB, Cheetham BF, Katz ME.** 2007. Characterization of regulatory non-catalytic hexokinases in *Aspergillus nidulans*. *Molecular Genetics and Genomics* **277**, 519–532.

- Casimiro I, Beekman T, Graham N, Bhalerao R, Zhang H, Casero P, Sandberg G, Bennett MJ.** 2003. Dissecting Arabidopsis lateral root development. *Trends in Plant Science* **8**, 165–171.
- Chen J-G, Willard FS, Huang J, Liang J, Chasse SA, Jones AM, Siderovski DP.** 2003. A seven-transmembrane RGS protein that modulates plant cell proliferation. *Science* **301**, 1728–1731.
- Chen Y, Ji F, Xie H, Liang J, Zhang J.** 2006. The regulator of G-protein signalling proteins involved in sugar and abscisic acid signalling in Arabidopsis seed germination. *Plant Physiology* **140**, 302–310.
- Cho JI, Ryoo N, Eom JS, et al.** 2009. Role of the rice hexokinases *OsHXK5* and *OsHXK6* as glucose sensors. *Plant Physiology* **149**, 745–759.
- Cho YH, Yoo SD, Sheen J.** 2006. Regulatory functions of nuclear hexokinase1 complex in glucose signalling. *Cell* **127**, 579–589.
- Claeysen E, Rivoal J.** 2007. Isozymes of plant hexokinase: occurrence, properties and functions. *Phytochemistry* **68**, 709–731.
- Clough SJ, Bent AF.** 1998. Floral dip: a simplified method for *Agrobacterium*-mediated transformation of *Arabidopsis thaliana*. *The Plant Journal* **16**, 735–743.
- Collett CE, Harberd NP, Leyser O.** 2000. Hormonal interactions in the control of Arabidopsis hypocotyl elongation. *Plant Physiology* **124**, 553–562.
- Crone D, Rueda J, Martin KL, Hamilton DA, Mascarenhas JP.** 2001. The differential expression of a heat shock promoter in floral and reproductive tissues. *Plant, Cell and Environment* **24**, 869–874.
- Daniel J.** 2005. Sir-dependent downregulation of various aging processes. *Molecular Genetics and Genomics* **274**, 539–547.
- De Grauwe L, Vandenbussche F, Tietz O, Palme K, Van Der Straeten D.** 2005. Auxin, ethylene and brassinosteroids: tripartite control of growth in the Arabidopsis hypocotyl. *Plant and Cell Physiology* **46**, 827–836.
- Dixon DP, McEwen AG, Laphorn AJ, Edwards R.** 2003. Forced evolution of a herbicide detoxifying glutathione transferase. *Journal of Biological Chemistry* **278**, 23930–23935.
- Fucile G, Falconer S, Christendat D.** 2008. Evolutionary diversification of plant shikimate kinase gene duplicates. *PLoS Genetics* **4**, e1000292.
- Fulton DC, Stettler M, Mettler T, et al.** 2008.  $\beta$ -AMYLASE4, a noncatalytic protein required for starch breakdown, acts upstream of three active  $\beta$ -amylases in Arabidopsis chloroplasts. *The Plant Cell* **20**, 1040–1058.
- Gancedo JM.** 2008. Early steps of glucose signalling in yeast. *FEMS Microbiology Review* **32**, 673–704.
- Giavalisco P, Kapitza K, Kolasa A, Buhtz A, Kehr J.** 2006. Towards the proteome of *Brassica napus* phloem sap. *Proteomics* **6**, 896–909.
- Gibson SI.** 2004. Sugar and phytohormone response pathways: navigating a signalling network. *Journal of Experimental Botany* **55**, 253–264.
- Han S, Kim D.** 2006. AtRTPrimer: database for Arabidopsis genome-wide homogeneous and specific RT-PCR primer-pairs. *BMC Bioinformatics* **7**, 179.
- Heazlewood JL, Tonti-Filippini JS, Gout AM, Day DA, Whelan J, Millar AH.** 2004. Experimental analysis of the Arabidopsis mitochondrial proteome highlights signalling and regulatory components, provides assessment of targeting prediction programs, and indicates plant-specific mitochondrial proteins. *The Plant Cell* **16**, 241–256.
- Higo KY, Ugawa M, Iwamoto Korenaga T.** 1999. Plant *cis*-acting regulatory DNA elements (PLACE) database. *Nucleic Acids Research* **27**, 297–300.
- Himanen K, Boucheron E, Vanneste S, de Almeida Engler J, Inzé D, Beeckman T.** 2002. Auxin-mediated cell cycle activation during early lateral root initiation. *The Plant Cell* **14**, 2339–2351.
- Hwang I, Sheen J.** 2001. Two-component circuitry in Arabidopsis cytokinin signal transduction. *Nature* **413**, 383–389.
- Igasaki T, Ishida Y, Mohri T, Ichikawa H, Shnohara K.** 2002. Transformation of *Populus alba* and direct selection of transformants with the herbicide bialaphos. *Bulletin of Forestry and Forest Products Research Institute* **1**, 235–240.
- Ingham D, Beer S, Money S, Hansen G.** 2001. Quantitative real-time PCR assay for determining copy number in transformed plants. *BioTechniques* **31**, 132–140.
- Jang JC, Leon P, Zhou L, Sheen J.** 1997. Hexokinase as a sugar sensor in higher plants. *The Plant Cell* **9**, 5–19.
- Jang JC, Sheen J.** 1994. Sugar sensing in higher plants. *The Plant Cell* **6**, 1665–1679.
- Johnston CA, Taylor JP, Gao Y, Kimple AJ, Grigston JC, Chen JG, Siderovski DP, Jones AM, Willard FS.** 2007. GTPase acceleration as the rate-limiting step in Arabidopsis G protein-coupled sugar signalling. *Proceedings of the National Academy of Sciences, USA* **104**, 17317–17322.
- Karve A, Rauh BL, Xia X, Kandasamy M, Meagher RB, Sheen J, Moore BD.** 2008. Expression and evolutionary features of the hexokinase gene family in Arabidopsis. *Planta* **228**, 411–425.
- Leon P, Sheen J.** 2003. Sugar and hormone connections. *Trends in Plant Science* **8**, 110–116.
- Molina C, Grotewold E.** 2005. Genome wide analysis of Arabidopsis core promoters. *BMC Genomics* **6**, 25.
- Moore B, Zhou L, Rolland F, Hall Q, Cheng WH, Liu YX, Hwang I, Jones T, Sheen J.** 2003. Role of the Arabidopsis glucose sensor HXK1 in nutrient, light, and hormonal signalling. *Science* **300**, 332–336.
- Negi S, Ivanchenko MG, Muday GK.** 2008. Ethylene regulates lateral root formation and auxin transport in *Arabidopsis thaliana*. *The Plant Journal* **55**, 175–187.
- Obayashi T, Kinoshita K, Nakai K, Shibaoka M, Hayashi S, Saeki M, Shibata D, Saito K, Ohta H.** 2007. ATTED-II: a database of co-expressed genes and *cis* elements for identifying co-regulated gene groups in *Arabidopsis*. *Nucleic Acids Research* **35**, D863–D869.
- Osuna D, Usadel B, Morcuende R, et al.** 2007. Temporal responses of transcripts, enzyme activities and metabolites after adding sucrose to carbon-deprived Arabidopsis seedlings. *The Plant Journal* **49**, 463–491.

- Perfus-Barbeoch L, Jones AM, Assmann SM.** 2004. Plant heterotrimeric G protein function: insights from Arabidopsis and rice mutants. *Current Opinion in Plant Biology* **7**, 719–731.
- Price J, Laxmi A, St Martin SK, Jang JC.** 2004. Global transcription profiling reveals multiple sugar signal transduction mechanisms in Arabidopsis. *The Plant Cell* **16**, 2128–2150.
- Robinson FL, Dixon JE.** 2006. Myotubularin phosphatases: policing 3-phosphoinositides. *Trends in Cell Biology* **16**, 403–412.
- Rognoni S, Teng S, Arru L, Smeekens S, Perata P.** 2007. Sugar effects on early seedling development in Arabidopsis. *Plant Growth Regulation* **52**, 217–228.
- Rolland F, Baena-Gonzalez E, Sheen J.** 2006. Sugar sensing and signalling in plants: conserved and novel mechanisms. *Annual Review of Plant Biology* **57**, 675–709.
- Rost B, Liu J, Nair R, Wrzeszczynski KO, Ofra Y.** 2003. Automatic prediction of protein function. *Cellular and Molecular Life Sciences* **60**, 2637–2650.
- Salchert K, Bhalerao R, Koncz-Kálmán Z, Koncz C.** 1998. Control of cell elongation and stress responses by steroid hormones and carbon catabolic repression in plants. *Philosophical Transactions of the Royal Society of London, Biological Sciences* **353**, 1517–1520.
- Schaffner AR, Sheen J.** 1991. Maize *rbcS* promoter activity depends on sequence elements not found in dicot *rbcS* promoters. *The Plant Cell* **3**, 997–1012.
- Smalle J, Haegman M, Kurepa J, Van Montagu M, Straeten DV.** 1997. Ethylene can stimulate Arabidopsis hypocotyl elongation in the light. *Proceedings of the National Academy of Sciences, USA* **94**, 2756–2761.
- Towle HC.** 2005. Glucose as a regulator of eukaryotic gene transcription. *Trends in Endocrinology and Metabolism* **16**, 489–494.
- Xiang C, Han P, Lutziger I, Wang K, Oliver D.** 1999. A mini binary vector series for plant transformation. *Plant Molecular Biology* **40**, 711–717.
- Yoo SD, Cho YH, Sheen J.** 2007. Arabidopsis mesophyll protoplasts: a versatile cell system for transient gene expression analysis. *Nature Protocols* **2**, 1565–1572.
- Yu SM, Chiang CM.** 2008. Distinct hexokinases (HXKs) act as positive and negative regulators in sugar signalling pathways. *BMC Plant Biology* **60–61**.
